# Gut microbiome structure and adrenocortical activity in dogs with aggressive and phobic behavioral disorders

Mondo E<sup>1†</sup>, Barone M<sup>2†\*</sup>, Soverini M<sup>2</sup>, D'Amico F<sup>2</sup>, Marliani G<sup>1</sup>, Cocchi M<sup>1</sup>, Mattioli M<sup>1</sup>, Candela M<sup>2</sup> and Accorsi PE<sup>1\*</sup>

<sup>1</sup> Department of Medical Veterinary Science, University of Bologna, Ozzano Emilia, Italy

<sup>2</sup> Unit of Microbial Ecology of Health, Department of Pharmacy and Biotechnology, University of Bologna, Italy

<sup>†</sup> Contributed equally to the study

<sup>\*</sup> Corresponding authors

E-mail: [pierattilio.accorsi@unibo.it](mailto:pierattilio.accorsi@unibo.it) (PAE); [monica.barone@unibo.it](mailto:monica.barone@unibo.it) (MB)

## Abstract

Accompanying human beings since the Paleolithic period, dogs has been recently regarded as a reliable model for the study of the gut microbiome connections with health and disease. In order to provide some glimpses on the connections between the gut microbiome layout and host behavior, we profiled the phylogenetic composition and structure of the canine gut microbiome of dogs with aggressive (n = 17), phobic (n = 15) and normal behavior (n = 17). According to our findings, aggressive behavioral disorder was found to be characterized by a peculiar gut microbiome structure, with high biodiversity and enrichment in generally subdominant bacterial genera. On the other hand, phobic dogs were enriched in *Lactobacillus*, a bacterial genus with known probiotic and psychobiotic properties. Although further studies are needed to validate our findings, our work supports the intriguing opportunity that different behavioral phenotypes in dogs may be associated with peculiar gut microbiome layouts, suggesting possible connections between the gut microbiome and the central nervous system and indicating the possible adoption of probiotic interventions aimed at restoring a balanced host-symbiont interplay for mitigating behavioral disorders.

**Keywords:** microbiome, behavioral disorders, aggressive dogs, phobic dogs, hormones, HPA-axis

## Introduction

Descending from the gray wolf (*Canis lupus*), dogs were domesticated during the Paleolithic period, accompanying humans across the transition from hunting-gathering to rural agriculture of the Neolithic, to post-industrialized Western lifestyle [1-3]. The frequent sharing of food resources with human beings has been a selective force able to drive changes in the digestive and metabolic system of dogs, enabling them to efficiently adapt to a more starch-enriched diet compared to their wild ancestor, and ultimately influence canine behavior [4,5]. The canine gastrointestinal tract harbors a complex and highly biodiverse microbial ecosystem, whose predominant taxa resemble those typically found in the gut of other omnivorous mammals. However, in comparison to both mice and pigs, the canine gut microbiome (GM) result the most similar to humans [6,7]. Thus, in dogs, the GM-host mutualistic exchange well approximate what has been observed in humans [8-11]. Indeed, the peculiar patterns of dysbiosis observed in dogs with IBD are generally comparable to variations typically found in humans, suggesting that bacterial responses to inflammatory conditions are conserved among the two [12,13]. As observed in humans, the eubiotic and stable configuration of the canine GM is therefore of fundamental importance for the maintenance of a homeostatic gut environment and of the overall host health.

Several recent studies have shown the ability of the mammalian GM to communicate with the host central nervous system (CNS) through several parallel channels, involving the vagus nerve, neuroimmune and neuroendocrine signaling mechanisms, and the production of neuroactive chemicals – i.e. gamma-aminobutyric acid (GABA), serotonin (5-HT), norepinephrine and dopamine [14-17]. Conversely, the CNS can influence GM structure and metabolome, influencing the gut environment, acting on motility, secretion and permeability via the autonomic nervous system (ANS) [18]. It is thus a matter of fact that the GM can influence the host behavior and *vice versa*, exerting a key role in the modulation of the gut-brain axis. The development of researches

during the last decades indeed suggests the presence of a bidirectional communication between gut and brain.

Despite the high variability and severity of behavioral disorders observed in dogs, the aggressive behavior has been found to be the most common, followed by separation anxiety and phobia [19]. Aggressive, anxiety and phobia behavioral disorders can be considered as stress responses with an increase in glucocorticoid (GC) secretion mediated by the hypothalamic-pituitary-adrenal (HPA) axis [20,21]. Although recent works on canine microbiome have investigated potential interactions with aggression, these studies have focused on the variations of their GM profile after targeted dietary interventions to reduce aggressive behaviors [22,23]. To the best of our knowledge, no study has focused on the comparison of the GM structure between dogs exhibiting aggressive, phobic and normal behavior, with specific associations with adrenocortical activity. In order to provide some glimpses in this direction, in our work, 49 dogs – 31 males and 18 females – of different breed, age, and weight, housed in individual boxes were enrolled. Following the behavioral, dogs were classified into three groups: aggressive, phobic and normal behavior. We then profiled the phylogenetic composition and structure of their canine GM, measuring the levels of fecal hormones (i.e. cortisol and testosterone) to evaluate the adrenocortical activity in each study group. Fecal GC and their metabolites may constitute a reliable non-invasive proxy of adrenocortical activity, reflecting long-term stress responses with less interference from acute stressors [24-26].

Our data suggest that peculiar microbiome configurations could be connected with dogs' behavioral phenotype, which in turn might be exacerbated by altered proportions of gut symbionts, ultimately triggering a feedback loop. In this scenario, targeted interventions on GM could constitute a valuable tool to restore a proper host-symbiont interplay, finally mitigating behavioral disorders and improving the overall host health.

## Results

## Relative abundance of major gut microbiome components in the enrolled cohort

In order to evaluate possible differences in GM communities among the behavioral study groups, we collected fecal samples from 49 dogs. In particular, 31 males and 18 females of different breed, aged between 1 and 13 years, were recruited from three animal shelters located in the metropolitan area of Bologna (Italy). Following the behavioral evaluation performed in accordance with the C-BARQ [27], dogs were grouped based on their behavioral phenotype: 17 were scored as aggressive and 15 as phobic, while 17 exhibited a normal behavior. The 16S rRNA sequencing, performed using the Illumina MiSeq platform, yielded a total of 1,611,153 high-quality sequences, with an average of  $32,880 \pm 6,009$  sequences per sample (range 20,664 – 45,486), subsequently clustered in 8,460 OTUs with a 97% identity threshold.

The most abundant phyla detected within the normal behavior samples were Firmicutes ( $68.0 \pm 4.6\%$ ), Bacteroidetes ( $13.7 \pm 3.6\%$ ), and Actinobacteria ( $9.9 \pm 1.6\%$ ), with Fusobacteria ( $4.8 \pm 1.3\%$ ) and Proteobacteria ( $2.1 \pm 0.8\%$ ) as minor components. The aggressive group showed similar proportions among the dominant phyla when compared to the normal behavior group, except for a reduced relative abundance of Bacteroidetes (P-value = 0.02; Wilcoxon test). No significant differences at phylum level were detected between the phobic and the normal behavior groups, as well as between the phobic and the aggressive groups.

At family level, Lachnospiraceae, Erysipelotrichaceae and Clostridiaceae constitute the major components of the normal behavior group (relative abundance > 10%). A depletion in the relative abundance of Bacteroidaceae, Alcaligenaceae and [Paraprevotellaceae], as well as an increase in Erysipelotrichaceae (P-value < 0.05) was observed in the aggressive group compared to the normal behavior group. The phobic group was instead characterized by an increase in the relative abundance of the family Rikenellaceae (P-value = 0.04) when compared to the normal behavior

group. Aggressive and phobic groups were found to be distinguishable due to different proportions in the relative abundance of the bacterial families [Mogibacteriaceae] and Veillonellaceae, respectively depleted and enriched in the aggressive group ( $P < 0.04$ ) (Fig 1A, 1B).

At the genus taxonomic level, *Clostridium*, *Lactobacillus*, *Blautia* and *Collinsella* represent the major portion of the normal behavior group GM (relative abundance  $> 5\%$ ). Several microbial genera were found to be significantly depleted in the aggressive group. The relative abundance of the genera *Oscillospira*, *Peptostreptococcus*, *Bacteroides*, *Sutterella*, and *Coprobacillus* were significantly lower in aggressive compared to normal behavior group, while *Catenibacterium*, *Megamonas* and [*Eubacterium*] showed an opposite trend ( $P$ -value  $< 0.04$ ). At the genus level, no significant differences were detected between the phobic and the normal behavior group. The differences found between phobic and aggressive groups were due to an increased relative abundance of *Catenibacterium* and *Megamonas* in the latter group ( $P < 0.007$ ), in addition to a slightly depletion of the genus *Epulopiscium* ( $P = 0.04$ ) (S3 Fig).

**Fig 1. Canine gut microbiome profile of the behavior groups.** (A) Relative abundances of family-level taxa in each subject of the enrolled cohort (barplots) and respective average values of each study group (piecharts). (B) Boxplots showing the distribution of the relative abundances of bacterial families enriched or depleted within the gut microbiota of aggressive or phobic groups.

## **Comparison of the overall gut microbiome compositional structure between aggressive, phobic and normal behavior dogs**

The intra-individual diversity of the canine GM was assessed by means of the phylogenetic metric Observed OTUs and the Shannon biodiversity index at the genus level. While according to the Shannon index the intra-individual GM diversity was comparable between aggressive, phobic and normal behavior groups (mean  $\pm$  SD,  $5.2 \pm 0.8$ ,  $5.14 \pm 0.7$ , and  $5.2 \pm 0.7$ , respectively), the Observed OTUs metric highlighted a statistically significant difference between aggressive and

phobic groups (P-value = 0.02; Kruskal-Wallis test). In particular, the aggressive group was characterized by the higher number of different taxa observed (mean  $\pm$  SD, 583.9  $\pm$  310.6), the phobic group had the lower value (430.07  $\pm$  112.28), and the normal behavior group exhibited intermediate values (454.8  $\pm$  118.3) (Fig 2).

According to the Jaccard similarity index, the Principal Coordinates Analysis (PCoA) of the inter-sample variation highlighted a significant separation between the structural composition of the GM among study groups (P-value = 0.02, permutation test with pseudo-*F* ratios) (Fig 2). In order to identify bacterial drivers that contribute to groups clustering (permutation correlation test, P-value < 0.001), a superimposition of the genus relative abundance was performed on the PCoA plot. As showed in S1 Fig, major drivers of the normal behavior group segregation were *Faecalibacterium*, *Bacteroides*, *Phascolarctobacterium*, *Fusobacterium*, *Prevotella*, and [*Prevotella*]. The phobic group was characterized by an enrichment in *Lactobacillus*, while *Dorea*, *Blautia*, *Collinsella*, [*Ruminococcus*], *Slackia*, *Catenibacterium*, and *Megamonas* were more represented within the aggressive group.

To dissect discriminant GM component for dogs showing aggressive behavior, we applied the machine learning method Random Forest [28] to the genus level data set. Behavior-discriminatory bacterial genera were identified with distinctive changes in their relative abundances (Fig 3). Specifically, our analysis revealed two ‘aggressive-discriminatory’ bacterial genera: *Catenibacterium* and *Megamonas*.

**Fig 2. Biodiversity of the canine gut microbiome.** Boxplot showing the alpha diversity measures computed with phylogenetic and non-phylogenetic metrics (Shannon diversity index, observed OTUs). Behavior-related groups are identified with colored box and whiskers (orange, Aggressive; blue, Phobic; green, Normal). Significant difference was found between aggressive and phobic groups, according to the observed OTUs metric (P-value = 0.02; Kruskal-Wallis test). Principal coordinate analysis (PCoA) plots showing the beta diversity of the intestinal bacterial communities

of the study groups, based on Jaccard similarity index. A significant separation between aggressive and phobic behavior groups was found (P-value = 0.02, permutation test with pseudo-*F* ratios).

**Fig 3. Behavior-related gut microbiome signature.** Top 26 features from the obtained dataset as revealed by Random Forest. Stars denote the bacterial genera discriminant of aggressive group. Boxplots shows the comparison of the relative abundances of these bacterial genera between the study groups.

## Fecal cortisol and testosterone levels

Cortisol and testosterone levels were measured in fecal samples through RIAs. The statistical analysis did not evidence any significant differences between the three groups of dogs for hormonal data. Our results showed that the three study groups had similar median value of fecal cortisol and testosterone levels (Fig 4A). However, it should be noticed that the range of testosterone level in aggressive and phobic populations is largest than in normal, so we can assume that there is a greater variability between subjects (Fig 4B). As consequences of the previously described results, the median of testosterone/cortisol (T/C) ratio were similar in all the three groups, only slightly higher in phobic than in aggressive and normal dogs (Fig 4C).

**Fig 4. Fecal hormone levels of the behavior groups.** Boxplots showing levels of cortisol (A) and testosterone (B), and testosterone/cortisol ratio (C) detected in stool samples of the study groups. No significant difference was found among study groups (P-value > 0.05, Kruskal-Wallis test).

## Discussion

Within the present work, we profiled the GM structure and measured the fecal cortisol and testosterone levels of 49 dogs - 31 males and 18 females - of different breed, age, and weight, housed in individual boxes of three animal shelters located in the metropolitan area of Bologna (Italy). Dogs were classified into three study groups based on their behavioral phenotype:



aggressive, phobic or normal behavior. The phylogenetic profiles of the canine GM observed in our cohort were found to be in line with those already reported in literature for healthy dogs [9,29,30], but with a slightly higher abundance of Firmicutes and Actinobacteria, as well as a corresponding lower abundance of Bacteroidetes and Proteobacteria. According to our results, the aggressive group GM is characterized by a higher number of observed OTUs compared to both phobic and normal behavior groups. Interestingly, the GM structure of our cohort segregate according to the behavioral disorder of the host, showing a stronger separation of the aggressive group. The latter group seems to be defined by a higher abundance of typically subdominant taxa, such as *Dorea*, *Blautia*, *Collinsella*, [*Ruminococcus*], *Slackia*, *Catenibacterium*, and *Megamonas*. Conversely, the phobic group is characterized by an enrichment of *Lactobacillus*, a bacterial genus comprising well-known GABA producers, the main CNS inhibitory neurotransmitter able to regulate emotional behavior in mice via the vagus nerve [31,32]. The major drivers for the normal behavior group segregation are *Faecalibacterium*, *Bacteroides*, *Phascolarctobacterium*, *Fusobacterium*, *Prevotella* and [*Prevotella*], reflecting the predominance of bacterial genera commonly associated with the GM of healthy dogs [12,33]. Finally, according to the literature, no correlation was observed regarding the phobic behavior in relation to sex or age [19].

According to our results, fecal cortisol and testosterone levels of aggressive dogs did not significantly differ from those of phobic and normal dogs. Aggressive dogs are well known to possess higher blood concentrations of cortisol and lower serotonin levels than non-aggressive dogs [20]. However, fecal cortisol levels are not influenced by the activation of HPA axis during the sampling procedure, which is itself stressful for the animal [34]. This can possibly explain the differences in the observed cortisol levels between studies carried out in blood or fecal samples, Testosterone is often correlate with aggressive behaviors in many species [35], but this association is not completely demonstrated in dogs. Indeed, some studies have evidenced that the castration reduce only mildly aggressiveness and that neutered dogs can be more aggressive [36,37]. In

contrast with results of Terburg *et al.* [38], who suggested that a high value of T/C ratio may be a predictive factor of aggressive behavior, we found no significant differences between groups. Studies about cortisol in phobic state are confusing, and it seems that cortisol does not increase, or increase only slightly in phobic subjects compared to normal ones [39]. Our results did not show any significant differences between phobic and normal dogs for cortisol concentration. However, the cortisol level of phobic dogs is slightly lower than normal ones. Phobic state can cause a chronic and excessive stress [40], and scientific literature about phobic dogs suggests that they can tend to a depressive state. In human beings and in dogs, depression is characterized by lower cortisol and serotonin levels [41].

Our results suggest that dysbiotic GM configurations in a long-term stress levels scenario might influence the local gut environment through the release of potentially neuroactive microbial by-products, probably affecting the behavior of the host mainly as a side effect. In particular, dogs exhibiting aggressive behavioral disorders were characterized by a peculiar GM structure, a high biodiversity and an enrichment in generally subdominant bacterial genera. We then applied a machine learning method (Random Forest) to our genus level data set, identifying *Catenibacterium* and *Megamonas* as bacterial discriminants of aggressive behavior. Respectively belonging to the families Erysipelotrichaceae and Veillonellaceae, *Catenibacterium* and *Megamonas* have been recently correlated with primary bile acid metabolism and abdominal pain in humans [42-44], suggesting a possible connection between a dysbiotic GM profile and behavioral disorders. We found no alteration within the GM of dogs with phobic behavioral disorder except for an increase in *Lactobacillus*, bacterial genera with well-known probiotic properties. Interestingly, chronic treatment with *L.rhamnosus* can influence anxiety- and depression-related behavior by modulating GABA receptor mRNA expression in specific brain regions [31]. Even if it is impossible to dissect the factors supporting the increase of *Lactobacillus* observed in phobic dogs, it is tempting to speculate that a higher abundance of this psychobiotics [45,46] could contribute to the establishment of peculiarities of the phobic behavioral phenotype. However, further studies are

required to validate our findings. Indeed, the limitations due to the small number of enrolled animals imply a limited statistical power. Further, invasive blood sampling will be necessary, allowing to match blood and fecal cortisol and testosterone levels to find robust connections with the GM state. Nonetheless, our study support the intriguing opportunity that different behavioral phenotypes in dogs associate with peculiar GM layouts. Particularly, aggressive dogs possess dysbiotic GM configuration, possibly exacerbating the host aggressiveness and supporting the adoption probiotic interventions aimed at restoring a balanced host-symbiont interplay, improving the overall host health and eventually mitigating behavioral disorders. This preliminary research can thus be considered a starting point for future studies of clinical interest, deepening the understanding of the mechanisms underlying the relationship between behavioral disorders and the GM, ultimately providing new insight into veterinary behavioral medicine and facilitating a predictive diagnosis of canine behavior.

## Materials and methods

### Enrolled animals, behavioral evaluation and sample collection

The entire study was previously evaluated and approved by the Scientific Ethic Committee for Animal Experimentation (University of Bologna). All the procedures were monitored by the responsible of the Department of Veterinary Medical Science (DIMEVET) for animal welfare.

In the study, 49 dogs (31 males and 18 females) of different breed, age, and weight, housed in individual boxes of three different animal shelters located in the metropolitan area of Bologna (Italy) were enrolled (S1 Table). The animals were fed on a mixed diet, including wet and dry commercial feed and additional homemade food.

For each animal, a behavioral evaluation was performed according to the Canine Behavioral Assessment and Research Questionnaire (C-BARQ) [27], classifying the dogs enrolled based on

their behavioral phenotype. Seventeen animals were scored as aggressive and 15 as phobic, while 17 animals exhibited a normal behavior. According to C-BARQ, behaviors placed within the aggressive category consisted of barking, growling and baring teeth, as well as snapping, lunging, biting, or attempting to bite [27]. On the other hand, phobic components consisted of excessive fear when exposed to particular sounds, objects or situations, often associated with exaggerated cowering, and/or vigorous attempts to escape, retreat or hide from the feared stimuli [27]. Phobia and aggressiveness are both expression of anxiety disorders and they are strictly correlate to distress conditions of animals [20,47].

Fecal samples were collected from each animal immediately after the evacuation, between 7:00 and 12:00 am, avoiding debris and cross-contaminations. Specimens were frozen with liquid nitrogen and transported to the laboratory, then stored at -80°C until DNA extraction and sequencing. The remaining part of fecal samples was picked up through non-sterile bags and frozen at -20°C until cortisol and testosterone assay.

## **Fecal cortisol and testosterone radioimmunoassays**

Cortisol and testosterone concentrations were determined by radioimmunoassays (RIAs) based on binding of <sup>3</sup>H-steroid by competitive adsorption [48]. All concentrations were expressed in pg/mg of fecal matter. Extraction methodology was modified from Schatz & Palme [21]. Cortisol and testosterone were extracted from fecal specimens (500 mg, wet weight) with methanol-water solution (5 ml, v/v 4:1) and ethyl ether (5 ml). The portion of ether was vaporized under an airstream suction hood at 37° C. Dry residue was finally dissolved again into 0.5 ml PBS (0.05 M, pH 7.5), adding 125, 250, 500, or 1000 pg of <sup>3</sup>H-cortisol or <sup>3</sup>H-testosterone to 500 mg of feces and incubating for 30 min at room temperature, performing a recovery test on five replicates. The extraction was performed as described before, yielding a mean percentage recovery of 87.5 ± 2.4 and 89.3 ± 2.1 for cortisol and testosterone, respectively. Cortisol and testosterone metabolites assay in feces were carried out according to Tamanini [49] and Gaiani [50], respectively. Analysis

were performed in duplicates. The cortisol RIA was performed using an antiserum to cortisol-21-hemisuccinate-BSA (anti- rabbit), at a working dilution of 1:20 000 and  $^3\text{H}$ -cortisol (30 pg/tube vial) as tracer. The testosterone RIA was performed using an antiserum to testosterone-3-carboxymethyloxime-BSA (anti- rabbit), at a working dilution of 1:35 000 and  $^3\text{H}$ -testosterone (31 pg/tube vial) as tracer. Fecal cortisol and testosterone samples containing high concentrations of endogenous steroids (100  $\mu\text{l}$ ) were serially diluted through PBS (0.05 M, pH 7.5) in volumes of 50, 25, 10 and 5 ml, in order to determine the parallelism between cortisol and testosterone standards. Parallelism was assessed between these serial dilutions of standards (ranging from 7.8 to 1000 pg/100 ml tube vial). Validation parameters of analysis were: sensitivity 0.19 pg/mg, intra-assay variability 5.9%, inter-assay variability 8.7%, for cortisol; sensitivity 1.1 pg/mg, intra-assay variability 6.2%, inter-assay variability 9.6%, for testosterone. Radioactivity was determined using a liquid scintillation  $\beta$  counter and a linear standard curve, ad hoc designed by a software program [51].

## **Bacterial DNA extraction from stool samples**

Total microbial DNA was extracted from each fecal sample using the DNeasy Blood & Tissue kit (QIAGEN), with the modified protocol described by Turrone *et al.* [52]. Briefly, 250 mg of feces were resuspended in 1 ml of lysis buffer (500 mM NaCl, 50 mM Tris-HCl pH 8, 50 mM EDTA, 4% SDS). Fecal samples were added with four 3-mm glass beads and 0.5 g of 0.1-mm zirconia beads (BioSpec Products, Bartlesville, USA) and homogenized with 3 bead-beating steps using the FastPrep instrument (MP Biomedicals, Irvine, CA) at 5.5 movements/s for 1 min, keeping the samples on ice for 5 min after each treatment. Samples were subsequently heated at 95°C for 15 min and centrifuged to pellet stool particles. Supernatants were added with 260  $\mu\text{l}$  of 10 M ammonium acetate, centrifuged for 10 min at full speed, and incubated in ice for 30 min with one volume of isopropanol. Nucleic acids were collected by centrifugation, washed with 70% ethanol

and resuspended in 100 µl of TE buffer. RNA and protein removal was performed by incubating the samples with DNase-free RNase (10 mg/ml) at 37°C for 15 min and protease K at 70°C for 10 min, respectively. Subsequently, DNA purification with QIAmp Mini Spin columns were performed as per manufacturers instruction. The extracted bacterial DNA was quantified using the NanoDrop ND-1000 spectrophotometer (NanoDrop Technologies).

## PCR amplification and sequencing

The V3-V4 region of the 16S rRNA was amplified with PCR using 200 nmol/l of S-D-Bact-0341-b-S-17/S-D-Bact-0785-a-A-21 primers [53] with Illumina overhang adapter sequences, in a final volume of 25 µl containing 12.5 ng of genomic DNA and 2X KAPA HiFi HotStart ReadyMix (Kapa Biosystems). PCR reactions were performed in a Thermal Cycle T gradient (Biometra GmbH) using the following thermal program: 3 min at 95°C for the initial denaturation, followed by 25 cycles of denaturation at 95°C for 30 sec, annealing at 55°C for 30 sec, extension at 72°C for 30 sec, and a final extension step at 72°C for 5 min. PCR products of about 460 bp were purified using a magnetic bead-based system (Agencourt AMPure XP; Beckman Coulter) and sequenced on Illumina MiSeq platform using the 2 x 250 bp protocol, according to the manufacturer's instructions (Illumina). The libraries were pooled at equimolar concentrations, denatured and diluted to 6 pmol/l before loading onto the MiSeq flow cell.

## Bioinformatics and statistics

Raw sequences were processed using a pipeline combining PANDAseq [54] and QIIME [55]. The UCLUST software [56] was used to bin high-quality reads into operational taxonomic units (OTUs) through an open-reference strategy at a 0.97 similarity threshold. Taxonomy was assigned using the RDP classifier and the Greengenes database as a reference (release May 2013). Chimera filtering was performed discarding all singleton OTUs. Alpha rarefaction was evaluated by using the

Observed OTUs metric, and the Shannon biodiversity index, which aims to measure diversity based on evenness, while beta diversity was estimated according to the Jaccard similarity. Random Forests and all statistical analysis was computed using R software (version 3.1.3) and the packages randomForest, vegan and made4. The significance of data separation on the PCoA was tested using a permutation test with pseudo-*F* ratios (function adonis of vegan package). Non-parametric and correlation tests were achieved with Wilcoxon rank-sum or Kruskal-Wallis test and the Kendall tau, respectively. Cortisol and testosterone concentrations, as well as T/C ratio was analyzed using the normality test of Shapiro-Wilk, in order to establish the distribution of each variable in the population. P-values < 0.05 were considered statistically significant.

## References

1. Frantz LA, Mullin VE, Pionnier-Capitan M, Lebrasseur O, Ollivier M, Perri A, et al. Genomic and archaeological evidence suggest a dual origin of domestic dogs. *Science*. 2016;352(6290):1228-31. doi: 10.1126/science.aaf3161. PubMed PMID: 27257259.
2. Wang GD, Zhai W, Yang HC, Fan RX, Cao X, Zhong L, et al. The genomics of selection in dogs and the parallel evolution between dogs and humans. *Nat Commun*. 2013;4:1860. doi: 10.1038/ncomms2814. PubMed PMID: 23673645.
3. Larson G, Karlsson EK, Perri A, Webster MT, Ho SY, Peters J, et al. Rethinking dog domestication by integrating genetics, archeology, and biogeography. *Proc Natl Acad Sci U S A*. 2012;109(23):8878-83. doi: 10.1073/pnas.1203005109. PubMed PMID: 22615366; PubMed Central PMCID: PMC3384140.
4. Ollivier M, Tresset A, Bastian F, Lagoutte L, Axelsson E, Arendt ML, et al. Amy2B copy number variation reveals starch diet adaptations in ancient European dogs. *R Soc Open Sci*. 2016;3(11):160449. doi: 10.1098/rsos.160449. PubMed PMID: 28018628; PubMed Central PMCID: PMC5180126.

- 378 5. Axelsson E, Ratnakumar A, Arendt ML, Maqbool K, Webster MT, Perloski M, et al. The  
379 genomic signature of dog domestication reveals adaptation to a starch-rich diet. *Nature*.  
380 2013;495(7441):360-4. doi: 10.1038/nature11837. PubMed PMID: 23354050.
- 381 6. Coelho LP, Kultima JR, Costea PI, Fournier C, Pan Y, Czarnecki-Maulden G, et al.  
382 Similarity of the dog and human gut microbiomes in gene content and response to diet.  
383 *Microbiome*. 2018;6(1):72. doi: 10.1186/s40168-018-0450-3. PubMed PMID: 29669589; PubMed  
384 Central PMCID: PMCPMC5907387.
- 385 7. Ley RE, Hamady M, Lozupone C, Turnbaugh PJ, Ramey RR, Bircher JS, et al. Evolution of  
386 mammals and their gut microbes. *Science*. 2008;320(5883):1647-51. doi: 10.1126/science.1155725.  
387 PubMed PMID: 18497261; PubMed Central PMCID: PMCPMC2649005.
- 388 8. Honneffer JB, Minamoto Y, Suchodolski JS. Microbiota alterations in acute and chronic  
389 gastrointestinal inflammation of cats and dogs. *World J Gastroenterol*. 2014;20(44):16489-97. doi:  
390 10.3748/wjg.v20.i44.16489. PubMed PMID: 25469017; PubMed Central PMCID:  
391 PMCPMC4248192.
- 392 9. Swanson KS, Dowd SE, Suchodolski JS, Middelbos IS, Vester BM, Barry KA, et al.  
393 Phylogenetic and gene-centric metagenomics of the canine intestinal microbiome reveals  
394 similarities with humans and mice. *ISME J*. 2011;5(4):639-49. doi: 10.1038/ismej.2010.162.  
395 PubMed PMID: 20962874; PubMed Central PMCID: PMCPMC3105739.
- 396 10. Song SJ, Lauber C, Costello EK, Lozupone CA, Humphrey G, Berg-Lyons D, et al.  
397 Cohabiting family members share microbiota with one another and with their dogs. *Elife*.  
398 2013;2:e00458. doi: 10.7554/eLife.00458. PubMed PMID: 23599893; PubMed Central PMCID:  
399 PMCPMC3628085.
- 400 11. Hayward JJ, Castelhana MG, Oliveira KC, Corey E, Balkman C, Baxter TL, et al. Complex  
401 disease and phenotype mapping in the domestic dog. *Nat Commun*. 2016;7:10460. doi:  
402 10.1038/ncomms10460. PubMed PMID: 26795439; PubMed Central PMCID: PMCPMC4735900.



- 403 12. Vazquez-Baeza Y, Hyde ER, Suchodolski JS, Knight R. Dog and human inflammatory  
404 bowel disease rely on overlapping yet distinct dysbiosis networks. *Nat Microbiol.* 2016;1:16177.  
405 doi: 10.1038/nmicrobiol.2016.177. PubMed PMID: 27694806.
- 406 13. Minamoto Y, Otoni CC, Steelman SM, Buyukleblebici O, Steiner JM, Jergens AE, et al.  
407 Alteration of the fecal microbiota and serum metabolite profiles in dogs with idiopathic  
408 inflammatory bowel disease. *Gut Microbes.* 2015;6(1):33-47. doi: 10.1080/19490976.2014.997612.  
409 PubMed PMID: 25531678; PubMed Central PMCID: PMC4615558.
- 410 14. Forsythe P, Bienenstock J, Kunze WA. Vagal pathways for microbiome-brain-gut axis  
411 communication. *Adv Exp Med Biol.* 2014;817:115-33. doi: 10.1007/978-1-4939-0897-4\_5.  
412 PubMed PMID: 24997031.
- 413 15. Fung TC, Olson CA, Hsiao EY. Interactions between the microbiota, immune and nervous  
414 systems in health and disease. *Nat Neurosci.* 2017;20(2):145-55. doi: 10.1038/nn.4476. PubMed  
415 PMID: 28092661.
- 416 16. Neuman H, Debelius JW, Knight R, Koren O. Microbial endocrinology: the interplay  
417 between the microbiota and the endocrine system. *FEMS Microbiol Rev.* 2015;39(4):509-21. doi:  
418 10.1093/femsre/fuu010. PubMed PMID: 25701044.
- 419 17. Lyte M. Microbial endocrinology in the microbiome-gut-brain axis: how bacterial  
420 production and utilization of neurochemicals influence behavior. *PLoS Pathog.*  
421 2013;9(11):e1003726. doi: 10.1371/journal.ppat.1003726. PubMed PMID: 24244158; PubMed  
422 Central PMCID: PMC3828163.
- 423 18. Mayer EA. Gut feelings: the emerging biology of gut-brain communication. *Nat Rev*  
424 *Neurosci.* 2011;12(8):453-66. doi: 10.1038/nrn3071. PubMed PMID: 21750565; PubMed Central  
425 PMCID: PMC3845678.
- 426 19. Yalcin E, Batmaz H. Signalment Factors, Comorbidity in Behavior Diagnoses in Dogs in  
427 Bursa Region, Turkey (2000 - 2004) *Acta Vet. Brno.* 2007; 76: 445-450. doi:  
428 10.2754/avb200776030445.

- 429 20. Rosado B, Garcia-Belenguer S, Leon M, Chacon G, Villegas A, Palacio J. Blood  
430 concentrations of serotonin, cortisol and dehydroepiandrosterone in aggressive dogs. Appl Anim  
431 Behav Sci. 2010;123(3-4):124-30. doi: 10.1016/j.applanim.2010.01.009. PubMed PMID:  
432 WOS:000275677500006.
- 433 21. Schatz S, Palme R. Measurement of faecal cortisol metabolites in cats and dogs: a non-  
434 invasive method for evaluating adrenocortical function. Vet Res Commun. 2001;25(4):271-87.  
435 PubMed PMID: 11432429.
- 436 22. Kirchoff NS, Udell MAR, Sharpton TJ. The gut microbiome correlates with conspecific  
437 aggression in a small population of rescued dogs (*Canis familiaris*). PeerJ Preprints. 2018;  
438 6:e26990v1. doi: 10.7287/peerj.preprints.26990v1.
- 439 23. Re S, Zanoletti M, Emanuele E. Aggressive dogs are characterized by low omega-3  
440 polyunsaturated fatty acid status. Vet Res Commun. 2008;32(3):225-30. doi: 10.1007/s11259-007-  
441 9021-y. PubMed PMID: 17891468.
- 442 24. Van der Weyde LK, Martin GB, Paris MC. Monitoring stress in captive and free-ranging  
443 African wild dogs (*Lycaon pictus*) using faecal glucocorticoid metabolites. Gen Comp Endocrinol.  
444 2016;226:50-5. doi: 10.1016/j.ygcen.2015.12.022. PubMed PMID: 26723188.
- 445 25. Kersey DC, Dehnhard M. The use of noninvasive and minimally invasive methods in  
446 endocrinology for threatened mammalian species conservation. Gen Comp Endocrinol.  
447 2014;203:296-306. doi: 10.1016/j.ygcen.2014.04.022. PubMed PMID: 24798579.
- 448 26. Sheriff MJ, Krebs CJ, Boonstra R. Assessing stress in animal populations: Do fecal and  
449 plasma glucocorticoids tell the same story? Gen Comp Endocrinol. 2010;166(3):614-9. doi:  
450 10.1016/j.ygcen.2009.12.017. PubMed PMID: 20051245.
- 451 27. Hsu Y, Serpell JA. Development and validation of a questionnaire for measuring behavior  
452 and temperament traits in pet dogs. J Am Vet Med Assoc. 2003.
- 453 28. Breiman, L. Random Forests. Mach Learn. 2001; 45: 5-32.

- 454 29. Omatsu T, Omura M, Katayama Y, Kimura T, Okumura M, Okumura A, et al. Molecular  
455 diversity of the faecal microbiota of Toy Poodles in Japan. J Vet Med Sci. 2018;80(5):749-54. doi:  
456 10.1292/jvms.17-0582. PubMed PMID: 29643280; PubMed Central PMCID: PMC5989017.
- 457 30. Sandri M, Dal Monego S, Conte G, Sgorlon S, Stefanon B. Raw meat based diet influences  
458 faecal microbiome and end products of fermentation in healthy dogs. BMC Vet Res. 2017;13(1):65.  
459 doi: 10.1186/s12917-017-0981-z. PubMed PMID: 28245817; PubMed Central PMCID:  
460 PMCPMC5331737.
- 461 31. Bravo JA, Forsythe P, Chew MV, Escaravage E, Savignac HM, Dinan TG, et al. Ingestion  
462 of Lactobacillus strain regulates emotional behavior and central GABA receptor expression in a  
463 mouse via the vagus nerve. Proc Natl Acad Sci U S A. 2011;108(38):16050-5. doi:  
464 10.1073/pnas.1102999108. PubMed PMID: 21876150; PubMed Central PMCID:  
465 PMCPMC3179073.
- 466 32. Lyte M. Probiotics function mechanistically as delivery vehicles for neuroactive  
467 compounds: Microbial endocrinology in the design and use of probiotics. Bioessays.  
468 2011;33(8):574-81. doi: 10.1002/bies.201100024. PubMed PMID: 21732396.
- 469 33. Garcia-Mazcorro JF, Dowd SE, Poulsen J, Steiner JM, Suchodolski JS. Abundance and  
470 short-term temporal variability of fecal microbiota in healthy dogs. Microbiologyopen.  
471 2012;1(3):340-7. doi: 10.1002/mbo3.36. PubMed PMID: 23170232; PubMed Central PMCID:  
472 PMCPMC3496977.
- 473 34. Farca AM, Cavana P, Badino P, Barbero R, Odore R, Pollicino P. Measurement of faecal  
474 corticoid metabolites in domestic dogs. Schweiz Arch Tierheilkd. 2006;148(12):649-55. doi:  
475 10.1024/0036-7281.148.12.649. PubMed PMID: 17263082.
- 476 35. Archer J. The Behavioural Biology of Aggression, Vol. 1. Cambridge (UK): CUP Archive.  
477 Cambridge University Press. 1988.

- 478 36. Neilson JC, Eckstein RA, Hart BL. Effects of castration on problem behaviors in male dogs  
479 with reference to age and duration of behavior. J Am Vet Med Assoc. 1997;211(2):180-2. PubMed  
480 PMID: 9227747.
- 481 37. Guy NC, Luescher UA, Dohoo SE, Spangler E, Miller JB, Dohoo IR, et al. Demographic  
482 and aggressive characteristics of dogs in a general veterinary caseload. Appl Anim Behav Sci.  
483 2001;74(1):15-28. doi: Doi 10.1016/S0168-1591(01)00153-8. PubMed PMID:  
484 WOS:000170357100002.
- 485 38. Terburg D, Morgan B, van Honk J. The testosterone-cortisol ratio: A hormonal marker for  
486 proneness to social aggression. Int J Law Psychiatry. 2009;32(4):216-23. doi:  
487 10.1016/j.ijlp.2009.04.008. PubMed PMID: 19446881.
- 488 39. Fyer AJ. Current approaches to etiology and pathophysiology of specific phobia. Biol  
489 Psychiatry. 1998;44(12):1295-304. PubMed PMID: 9861472.
- 490 40. Schull-Selcer EA, Stagg W. Advances ad phobias. An update on separation anxiety and  
491 noise aversion. Vet. Clin. Small Animal 1991; 38:1081-1106. doi: 10.1016/j.cvsm.2008.04.012.
- 492 41. Cocchi M, Gabrielli F, Tonello L, Delogu M, Beghelli V, Mattioli M, Accorsi PA.  
493 Molecular contiguity between human and animal consciousness through evolution: some  
494 considerations. J. Phylogen. & Evolution Biol. 2013; 1:1-8. doi: 10.4172/2329-9002.1000119.
- 495 42. Aleman JO, Bokulich NA, Swann JR, Walker JM, De Rosa JC, Battaglia T, et al. Fecal  
496 microbiota and bile acid interactions with systemic and adipose tissue metabolism in diet-induced  
497 weight loss of obese postmenopausal women. J Transl Med. 2018;16(1):244. doi: 10.1186/s12967-  
498 018-1619-z. PubMed PMID: 30176893; PubMed Central PMCID: PMC6122649.
- 499 43. Sakon H, Nagai F, Morotomi M, Tanaka R. Sutterella parvirubra sp. nov. and Megamonas  
500 funiformis sp. nov., isolated from human faeces. Int J Syst Evol Microbiol. 2008;58(Pt 4):970-5.  
501 doi: 10.1099/ijs.0.65456-0. PubMed PMID: 18398204.
- 502 44. Yusof N, Hamid N, Ma ZF, Lawenko RM, Wan Mohammad WMZ, Collins DA, et al.  
503 Exposure to environmental microbiota explains persistent abdominal pain and irritable bowel

- syndrome after a major flood. Gut Pathog. 2017;9:75. doi: 10.1186/s13099-017-0224-7. PubMed PMID: 29255490; PubMed Central PMCID: PMC5729606.
45. Dinan TG, Stanton C, Cryan JF. Psychobiotics: a novel class of psychotropic. Biol Psychiatry. 2013;74(10):720-6. doi: 10.1016/j.biopsych.2013.05.001. PubMed PMID: 23759244.
46. Sarkar A, Lehto SM, Harty S, Dinan TG, Cryan JF, Burnet PWJ. Psychobiotics and the manipulation of bacteria-gut-brain signals. Trends Neurosci. 2016;39(11):763-81. doi: 10.1016/j.tins.2016.09.002. PubMed PMID: 27793434; PubMed Central PMCID: PMC5102282.
47. Appleby D, Pluijmakers J. Separation anxiety in dogs: The function of homeostasis in its development and treatment. Clin Tech Small Anim Pract. 2004;19(4):205-15. doi: 10.1053/j.ctsap.2004.10.002. PubMed PMID: 18371317.
48. Fenske M, Schonheiter H. Thin-layer chromatography on silica-coated aluminium sheet as an adjunct to radioimmunoassay of steroids. J Chromatogr. 1991;563(1):178-83. PubMed PMID: 1648105.
49. Tamanini C, Giordano N, Chiesa F, Seren E. Plasma cortisol variations induced in the stallion by mating. Acta Endocrinol (Copenh). 1983;102(3):447-50. PubMed PMID: 6681927.
50. Gaiani R, Chiesa F, Mattioli M, Nannetti G, Galeati G. Androstenedione and testosterone concentrations in plasma and milk of the cow throughout pregnancy. J Reprod Fertil. 1984;70(1):55-9. PubMed PMID: 6694152.
51. Motta M, Esposti AD. A computer program for mathematical treatment of data in radioimmunoassay. Comput Programs Biomed. 1981.
52. Turrone S, Rampelli S, Biagi E, Consolandi C, Severgnini M, Peano C, et al. Temporal dynamics of the gut microbiota in people sharing a confined environment, a 520-day ground-based space simulation, MARS500. Microbiome. 2017.
53. Klindworth A, Pruesse E, Schweer T, Peplies J, Quast C, Horn M, et al. Evaluation of general 16S ribosomal RNA gene PCR primers for classical and next-generation sequencing-based

diversity studies. Nucleic Acids Res. 2013;41(1):e1. doi: 10.1093/nar/gks808. PubMed PMID: 22933715; PubMed Central PMCID: PMC3592464.

54. Masella AP, Bartram AK, Truszkowski JM, Brown DG, Neufeld JD. PANDAseq: paired-end assembler for illumina sequences. BMC Bioinformatics. 2012;13:31. doi: 10.1186/1471-2105-13-31. PubMed PMID: 22333067; PubMed Central PMCID: PMC3471323.

55. Caporaso JG, Kuczynski J, Stombaugh J, Bittinger K, Bushman FD, Costello EK, et al. QIIME allows analysis of high-throughput community sequencing data. Nat Methods. 2010;7(5):335-6. doi: 10.1038/nmeth.f.303. PubMed PMID: 20383131; PubMed Central PMCID: PMC3156573.

56. Edgar RC. Search and clustering orders of magnitude faster than BLAST. Bioinformatics. 2010;26(19):2460-1. doi: 10.1093/bioinformatics/btq461. PubMed PMID: 20709691.

## Supporting information

**S1 Table. Metadata of the enrolled cohort.**

**S1 Fig. Superimposition of the genus relative abundance on the PCoA plot.** Arrows represent the direction of significant correlations (permutation correlation test, P-value < 0.001).

**S2 Fig. Main bacterial genera represented within the canine gut microbiome.**

**A**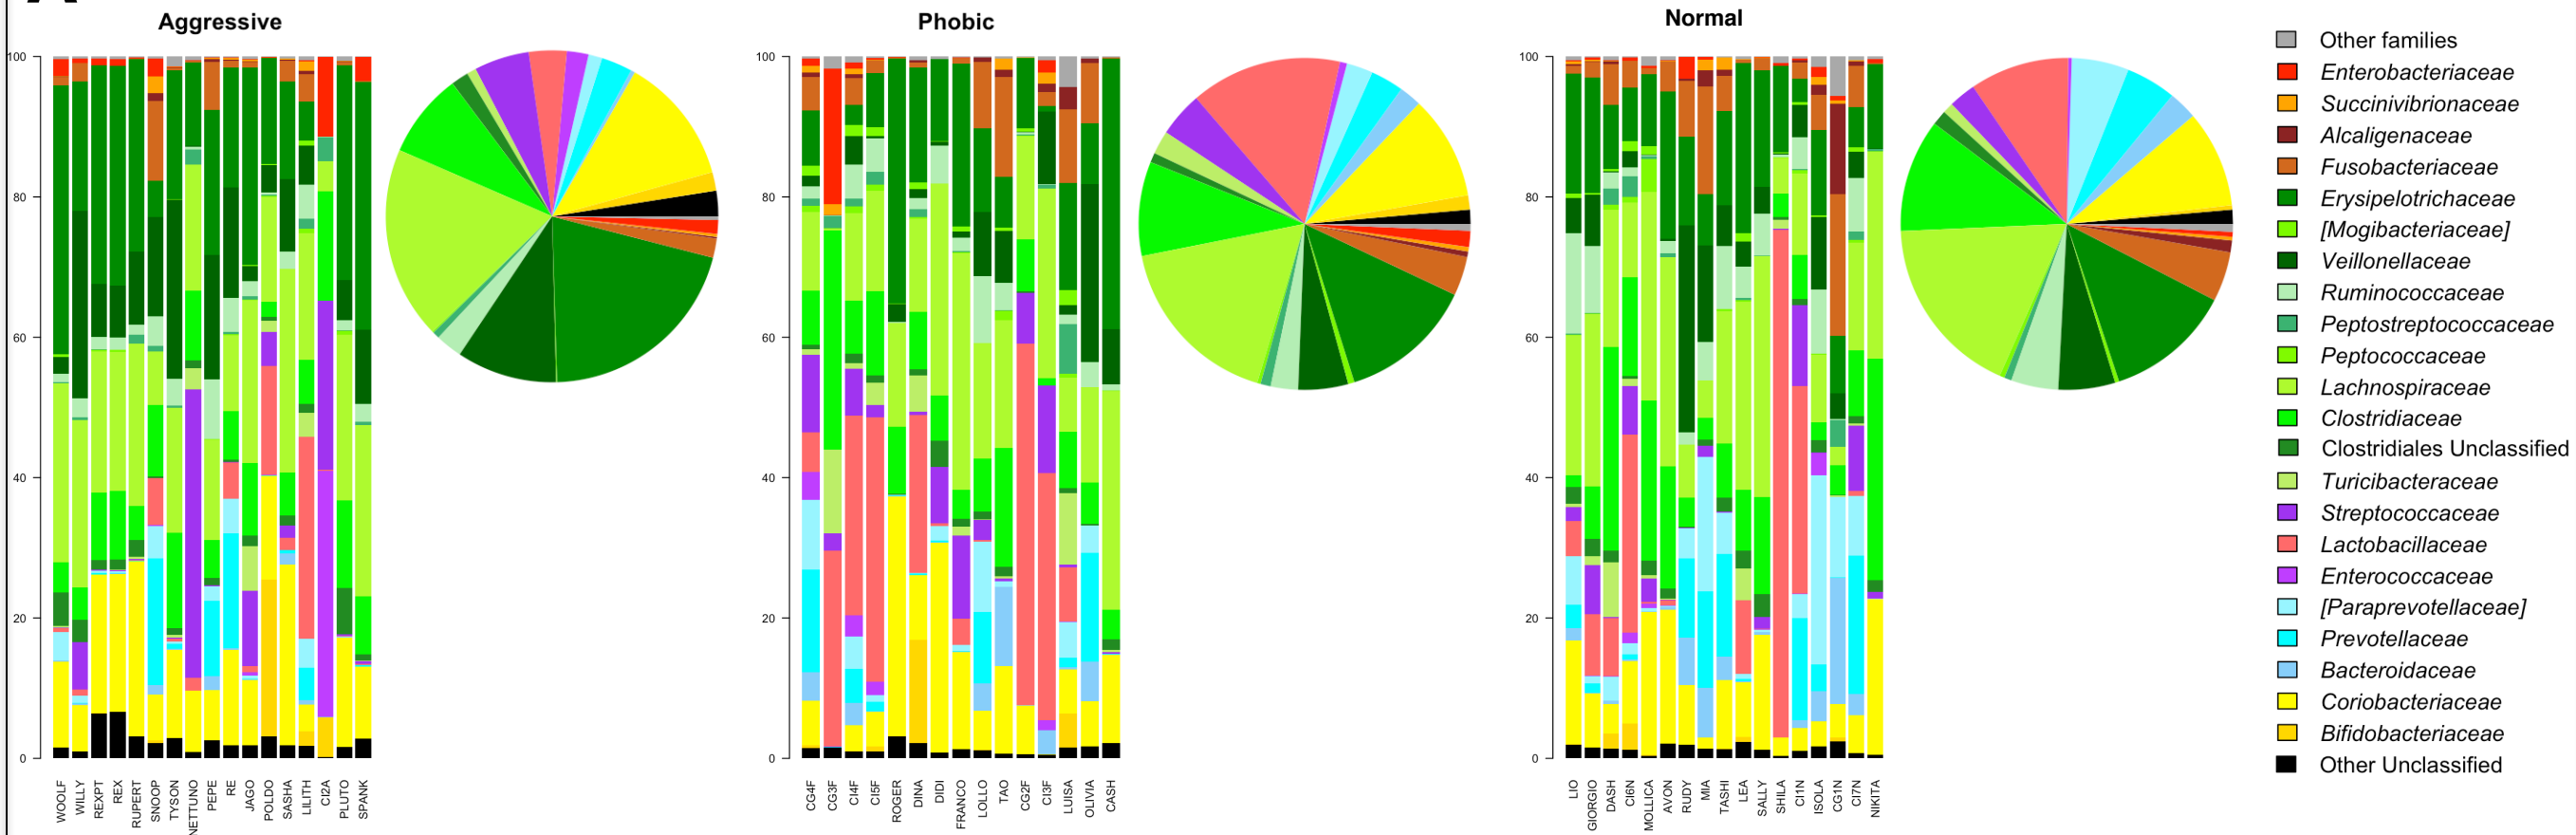**B**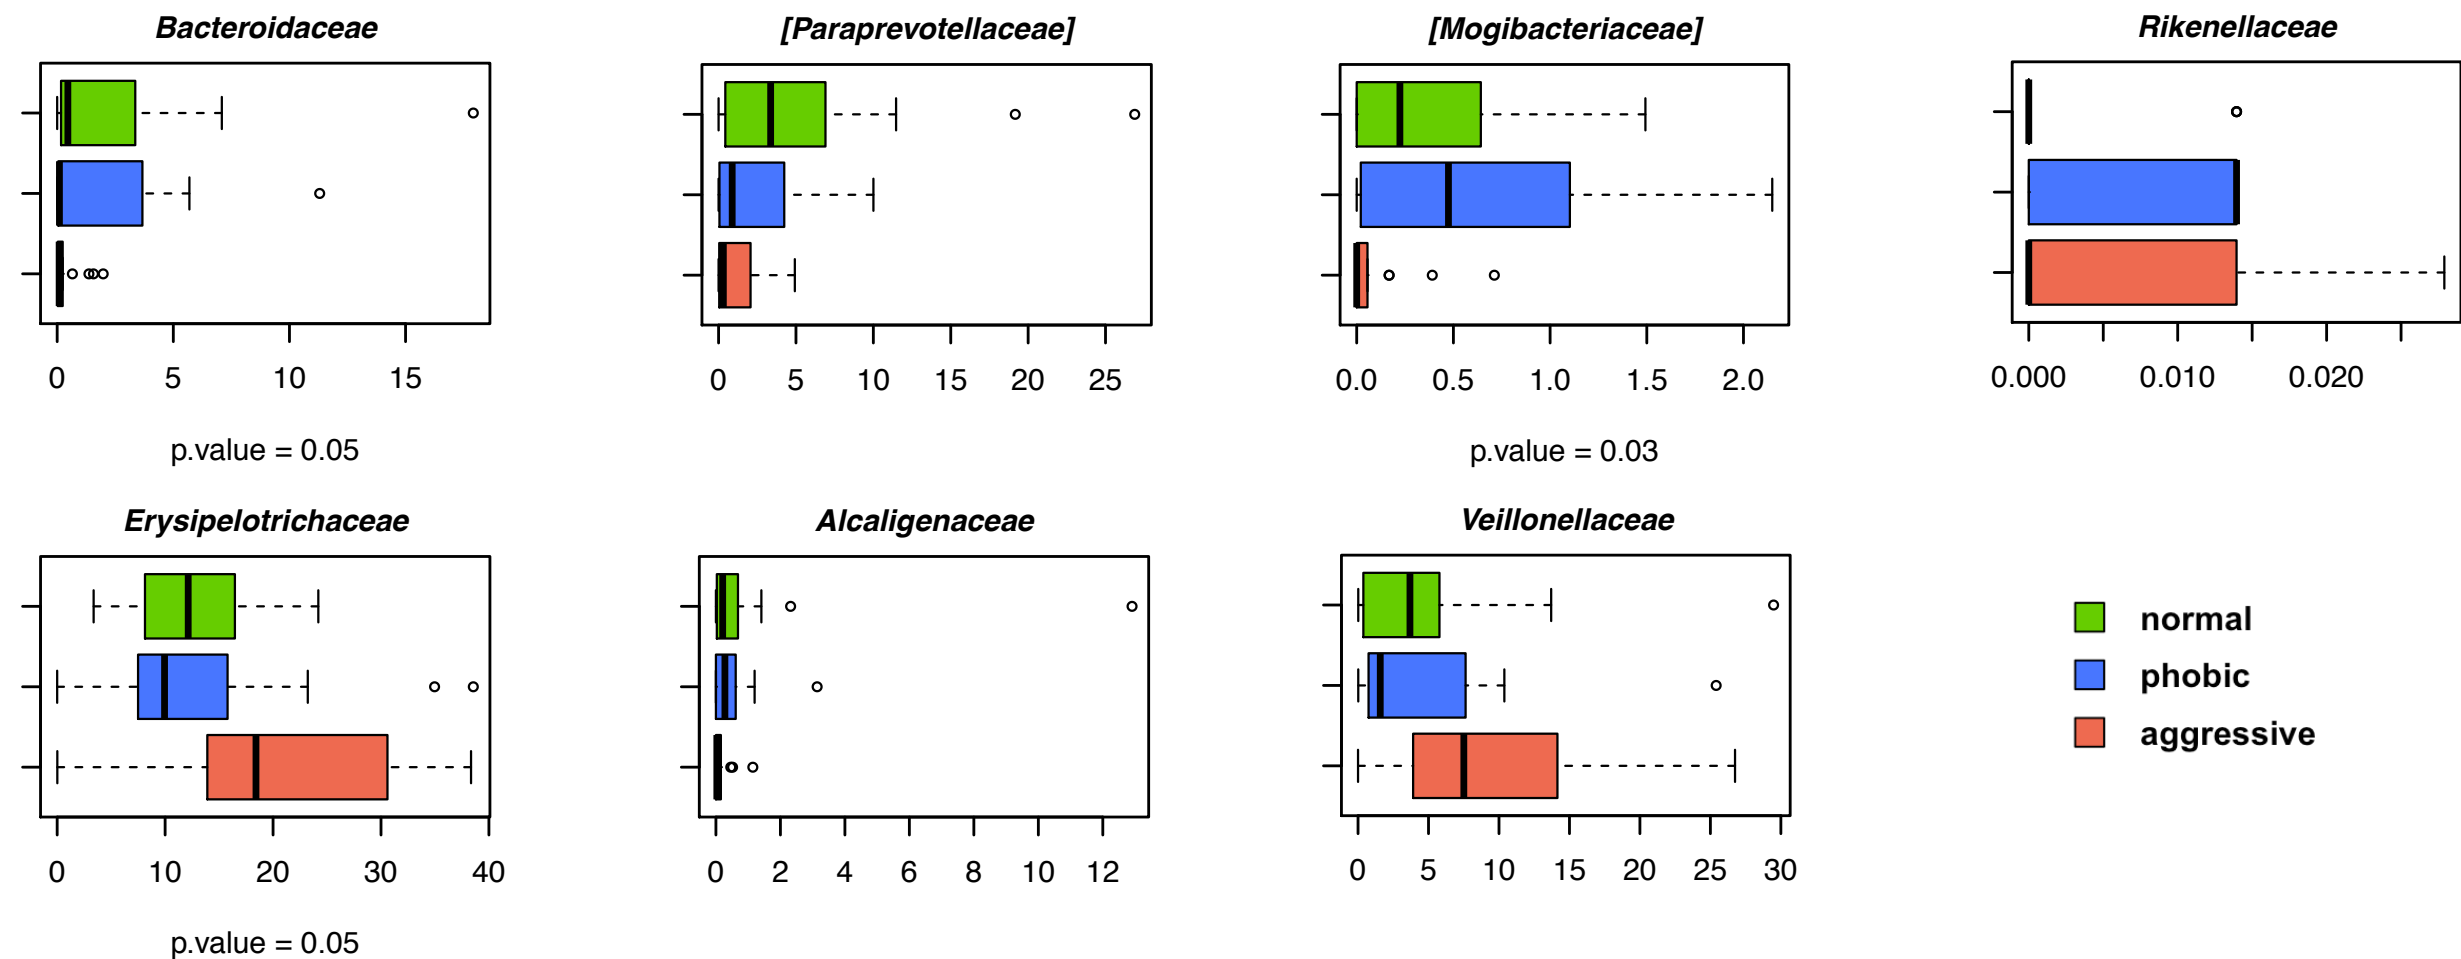

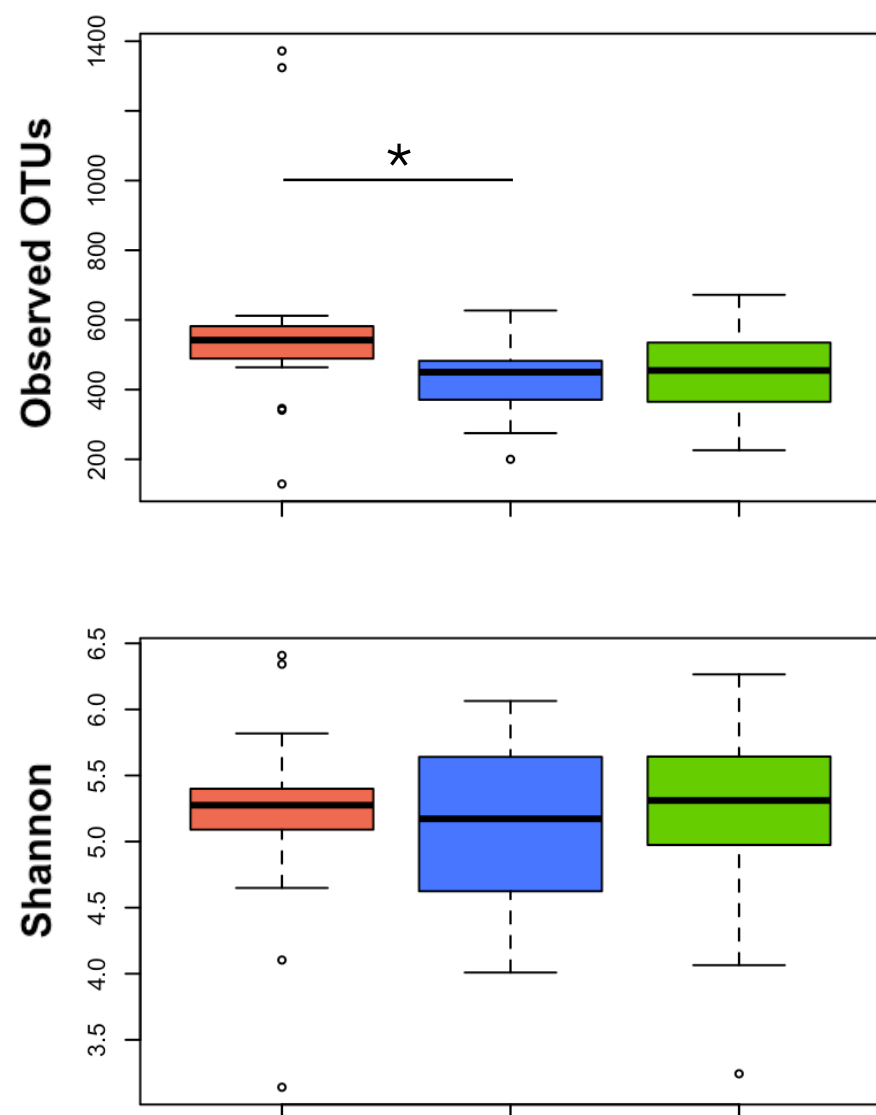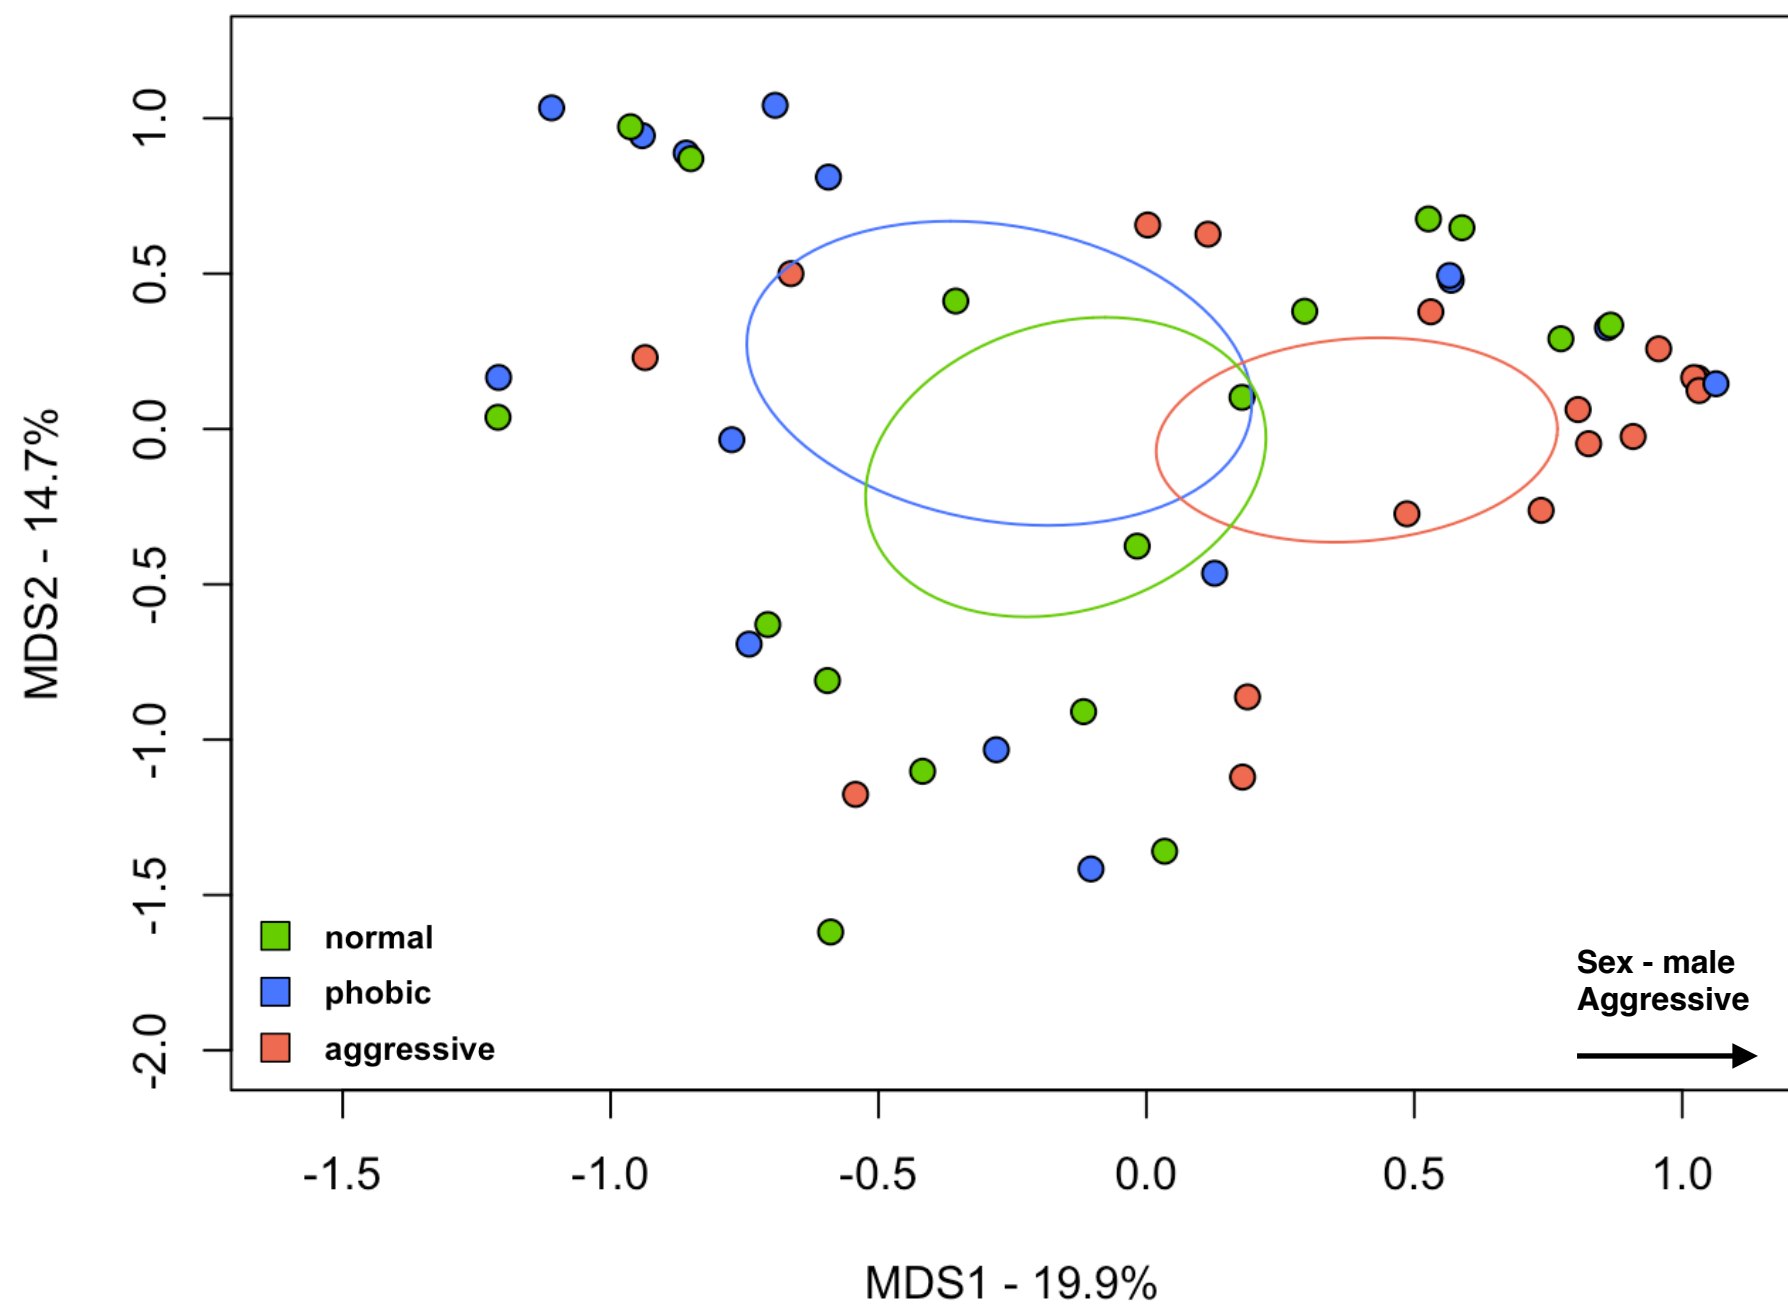



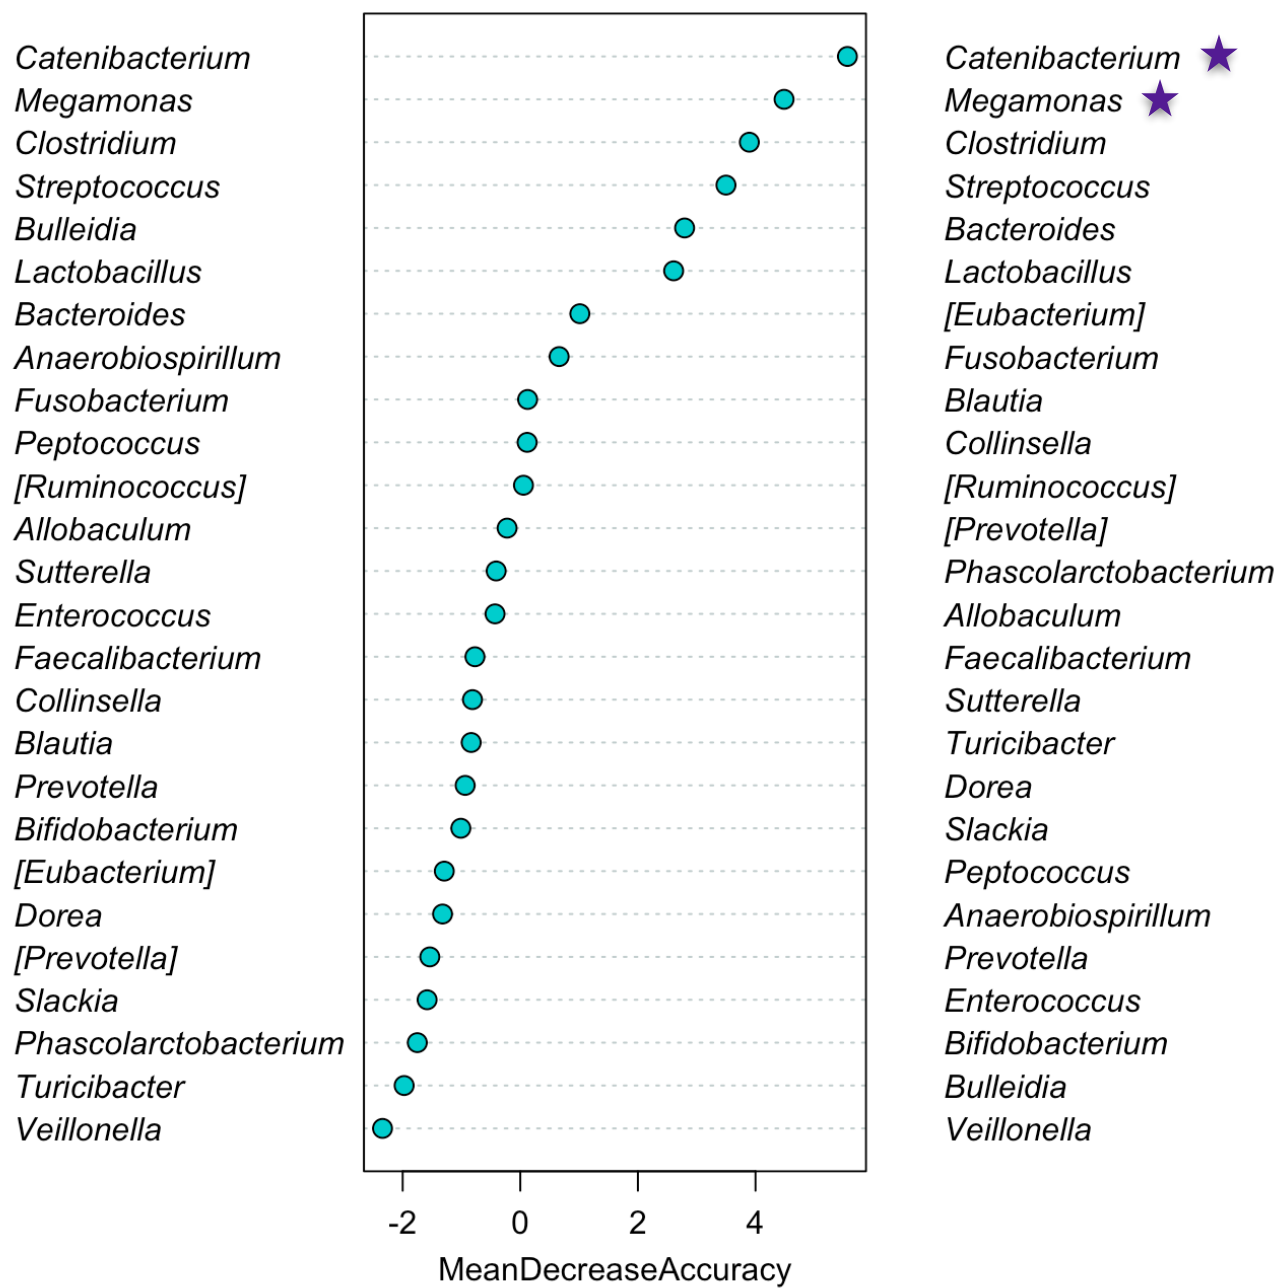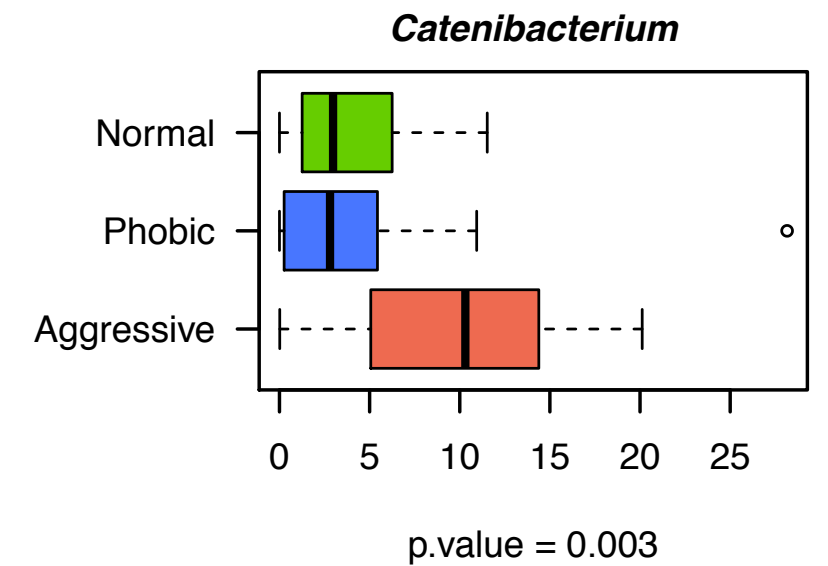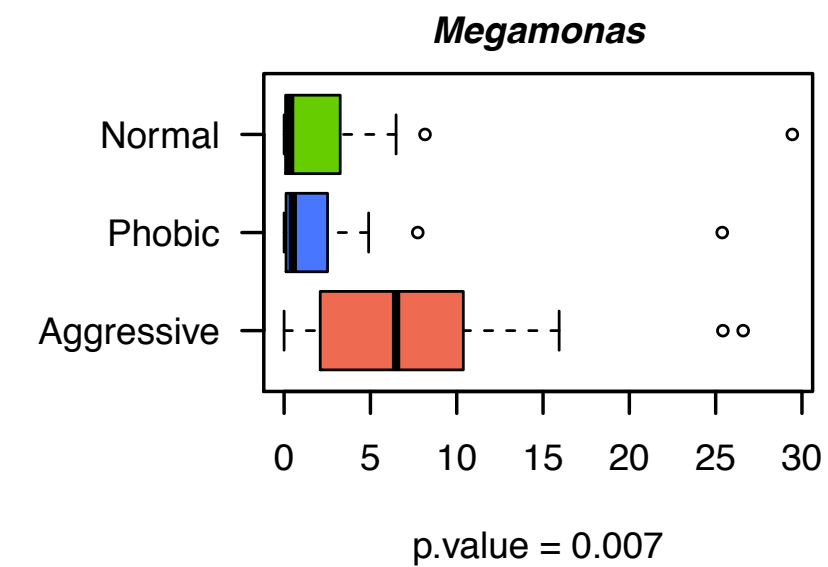

**A****Cortisol**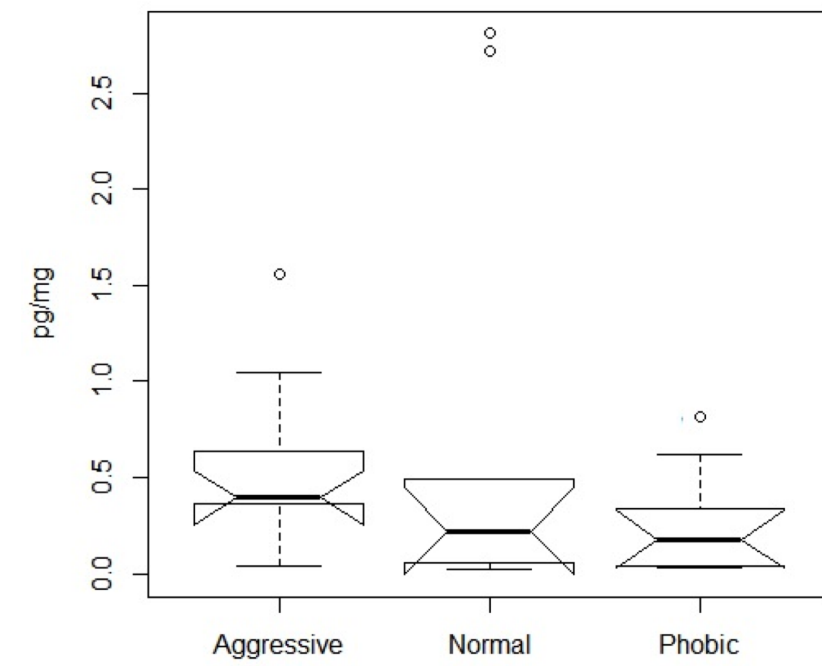**B****Testosterone**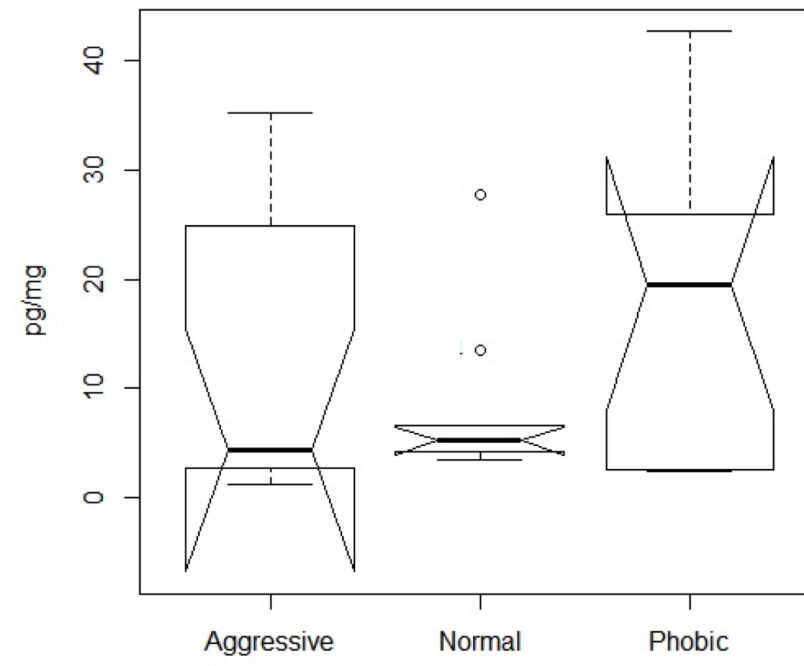**C****Testosterone/Cortisol**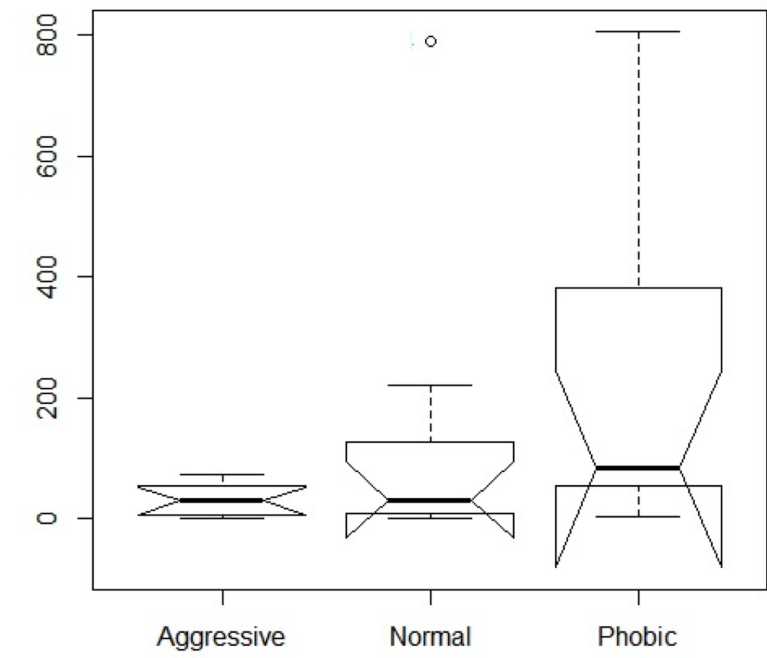

Source: https://www.biorxiv.org/content/10.1101/573865v1.full.pdf
